# Supplementary material for: Degradation of Toluene from Gas Streams by Heterogeneous Fenton Oxidation in a Slurry Bubble Reactor with Activated Carbon-Based Catalysts
Source: MDPI journal article supplement (doi:10.3390/nano12193274), 2022-09-21
Supplement: s1 [file s1]

## Supporting Information

# Degradation of Toluene from Gas Streams by Heterogeneous Fenton Oxidation in a Slurry Bubble Reactor with Activated Carbon-Based Catalysts

Emanuel F. S. Sampaio <sup>1,2,3</sup>, V. Guimarães <sup>1,2,3</sup>, O. S. G. P. Soares <sup>2,3</sup>, M. Fernando R. Pereira <sup>2,3</sup>, Carmen S. D. Rodrigues <sup>1,3</sup> and Luis M. Madeira <sup>1,3,\*</sup>

<sup>1</sup> LEPABE—Laboratory for Process Engineering, Environment, Biotechnology and Energy, Faculty of Engineering, University of Porto, Rua Dr. Roberto Frias, 4200-465 Porto, Portugal

<sup>2</sup> LSRE-LCM—Laboratory of Separation and Reaction Engineering—Laboratory of Catalysis and Materials, Faculty of Engineering, University of Porto, Rua Dr. Roberto Frias, 4200-465 Porto, Portugal

<sup>3</sup> ALiCE—Associated Laboratory in Chemical Engineering, Faculty of Engineering, University of Porto, Rua Dr. Roberto Frias, 4200-465 Porto, Portugal

\* Correspondence: mmadeira@fe.up.pt; Tel.: + 351-22-508-1519; Fax: +351-22-508-1449

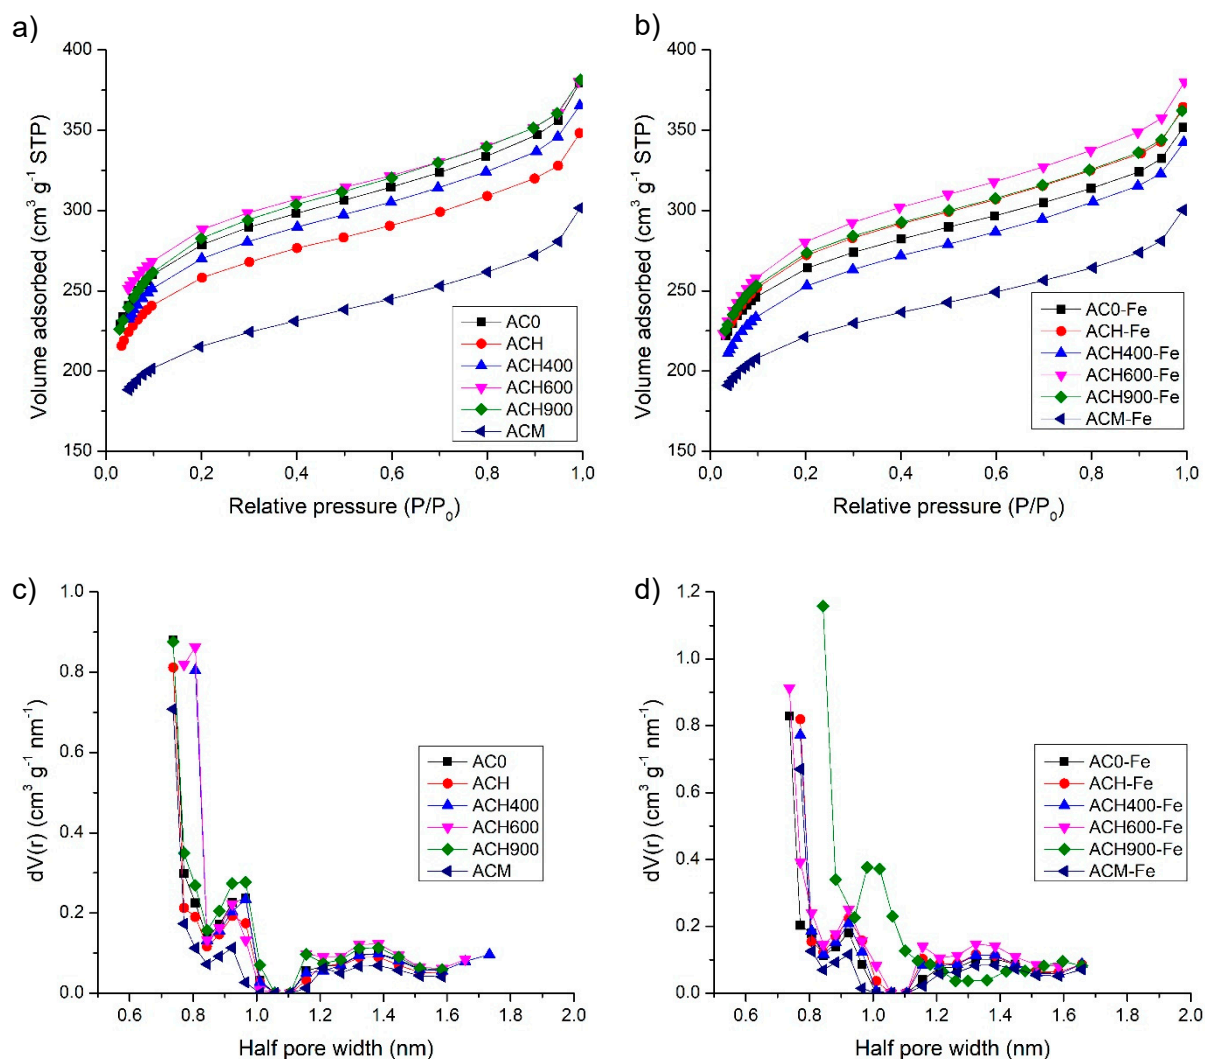

Figure S1 - N<sub>2</sub> adsorption isotherms (**a,b**) and pore size distribution (**c,d**) of the modified activated carbons (**a,c**) and respective iron-containing catalysts (**b,d**).

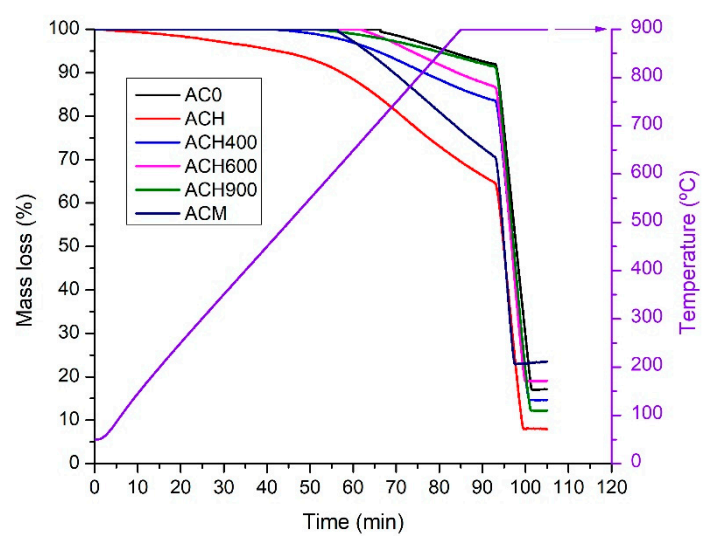

Figure S2 - Thermogravimetric profiles of the modified activated carbons.

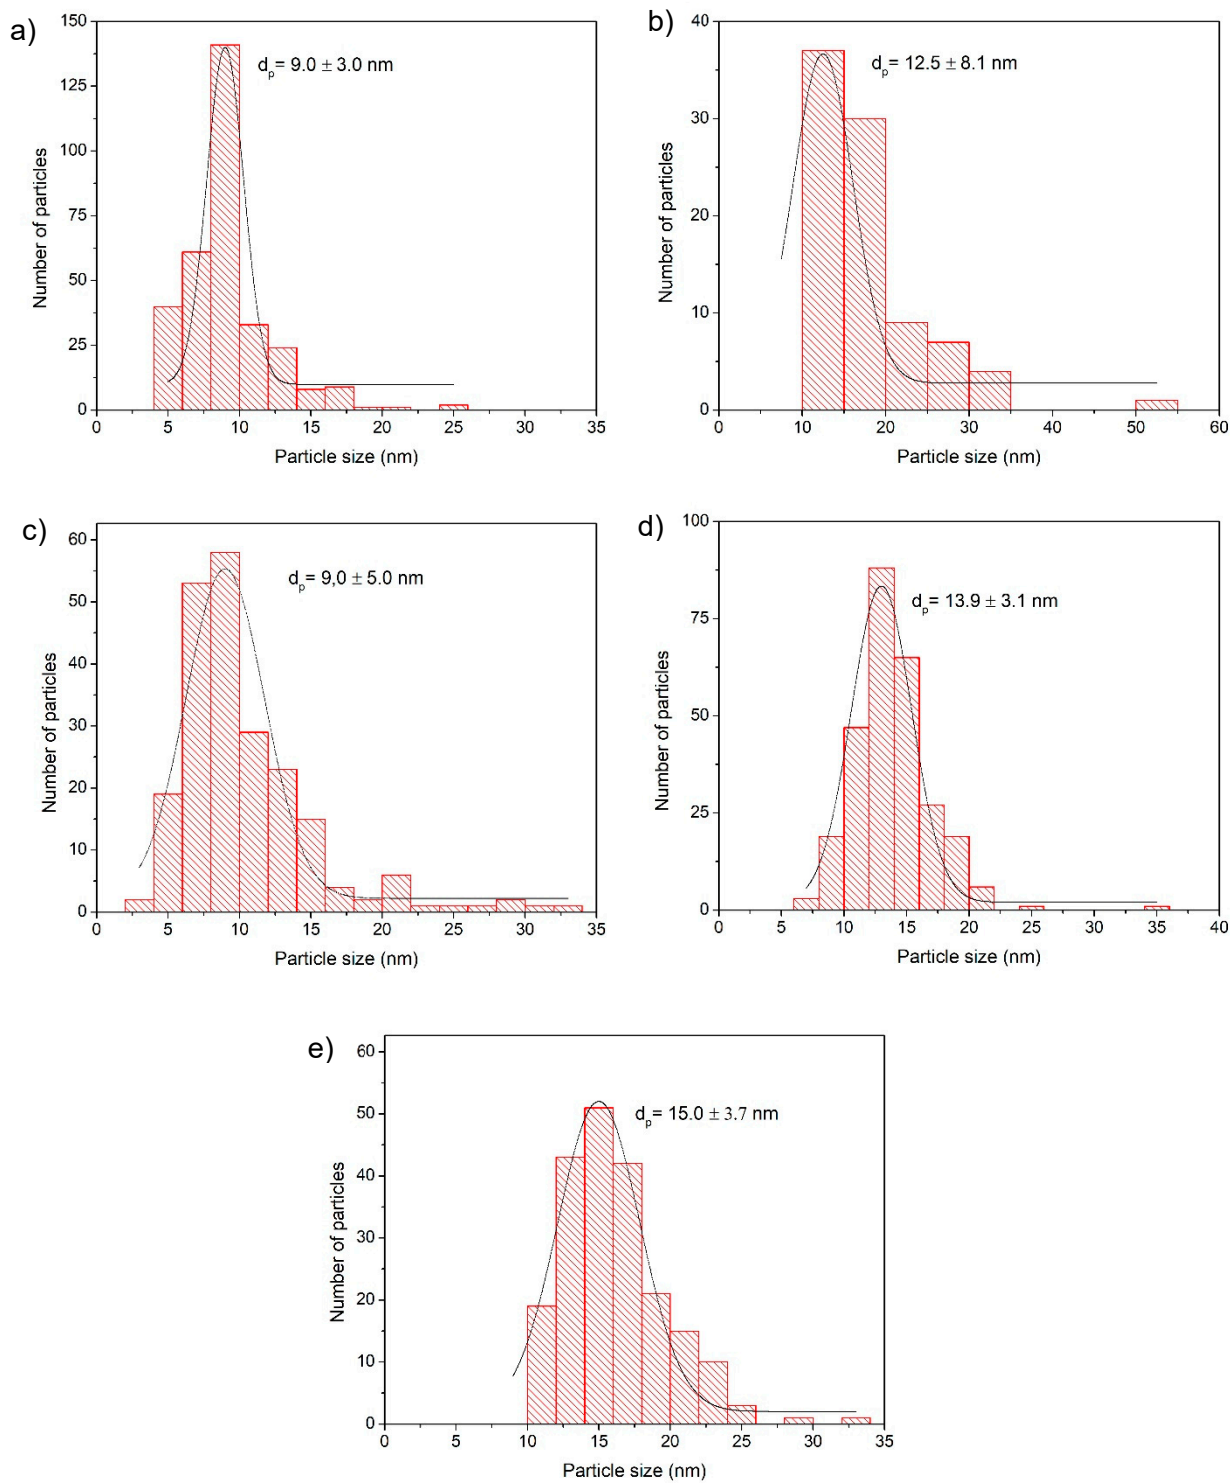

Figure S3 – Particle size distribution of ACM-Fe fresh sample (a), ACM-Fe used sample (b), ACo-Fe fresh sample (c), ACH-Fe fresh sample (d) and ACH<sub>900</sub>-Fe fresh sample (e).
